# Supplementary material
Source: PubMed Central journal article supplement (PMC11284837)

## Supplementary Materials

**Supplemental Figure 1.** Schematic of data collection periods for the study outcome and exposure.

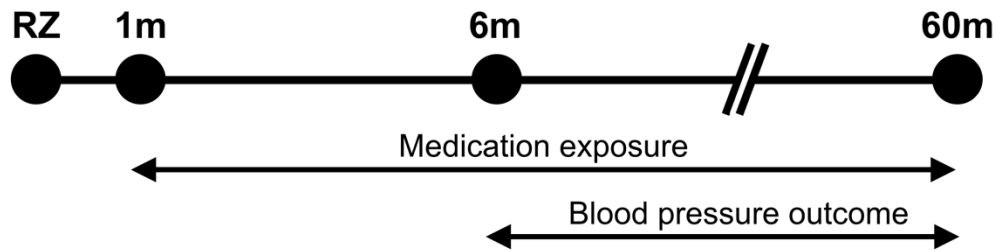

\*RZ: randomization visit, M: month

**Supplemental Figure 2.** Estimated densities of the probability of getting a dihydropyridine calcium channel blocker after augmented inverse-probability-weighting.

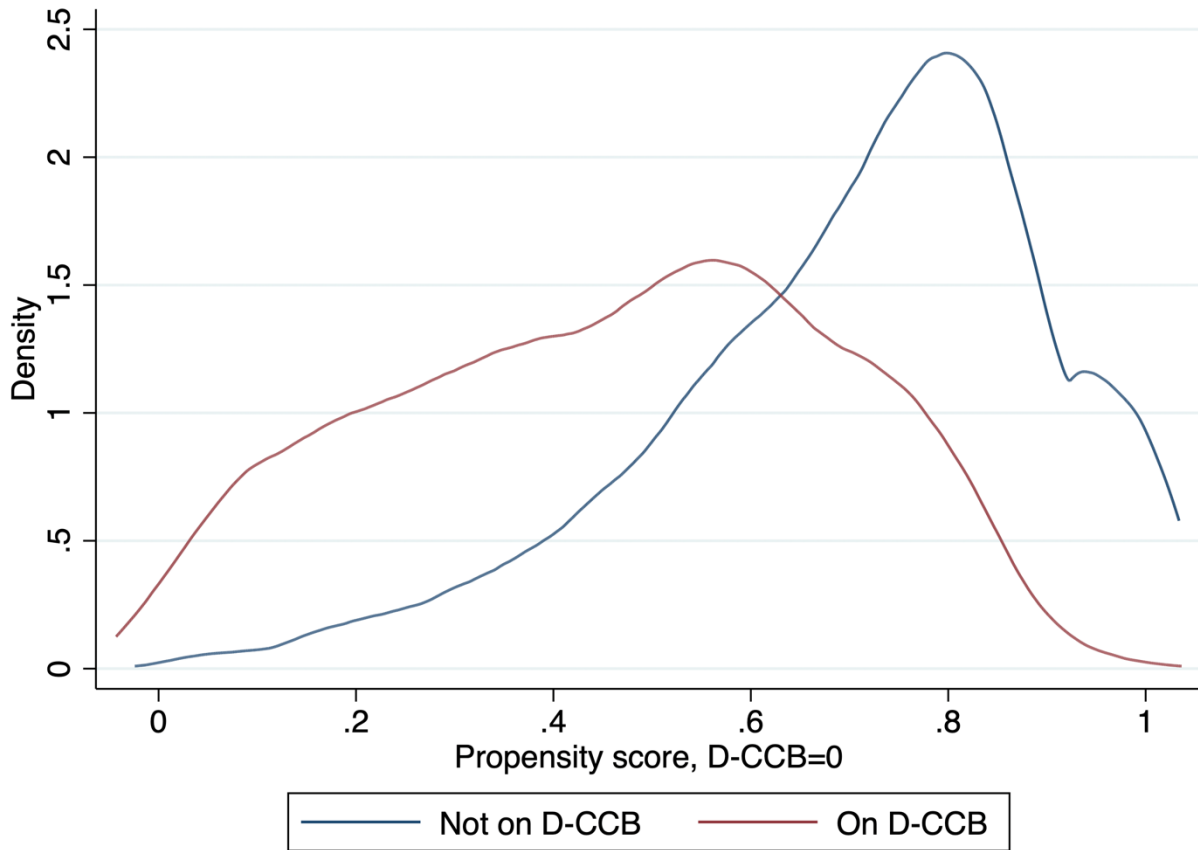

Supplement: NIHMS2010281-supplement-Supplement.pdf [file NIHMS2010281-supplement-Supplement.pdf]
